# Supplementary material for: A high-performance anode for lithium ion batteries: Fe3O4 microspheres encapsulated in hollow graphene shells
Source: Royal Society of Chemistry journal article supplement (doi:10.1039/c5ta01848j), 2015-01-01
Supplement: c5ta01848j1.pdf [file c5ta01848j1.pdf]

## Supporting Information

### A High-Performance Anode for Lithium Ion Batteries: $\text{Fe}_3\text{O}_4$

#### Microspheres Encapsulated in Hollow Graphene Shells

Yu Jiang<sup>a</sup>, Zhong-Jie Jiang<sup>a,\*</sup>, Lufeng Yang<sup>a</sup>, Shuang Cheng<sup>a</sup>, Meilin Liu<sup>a,b,\*</sup>

<sup>a</sup> New Energy Research Institute, College of Environment and Energy, South China University of Technology, Guangzhou 510006, Guangdong, China

<sup>b</sup> School of Materials Science & Engineering, GA Institute of Technology, Atlanta, GA 30332, USA.

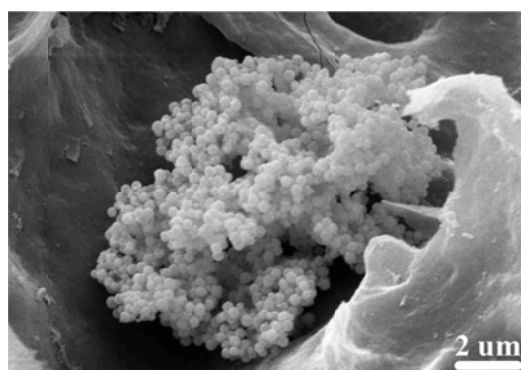

Figure S1. An SEM image of a physical mixture of  $\text{Fe}_3\text{O}_4$  and rGO.

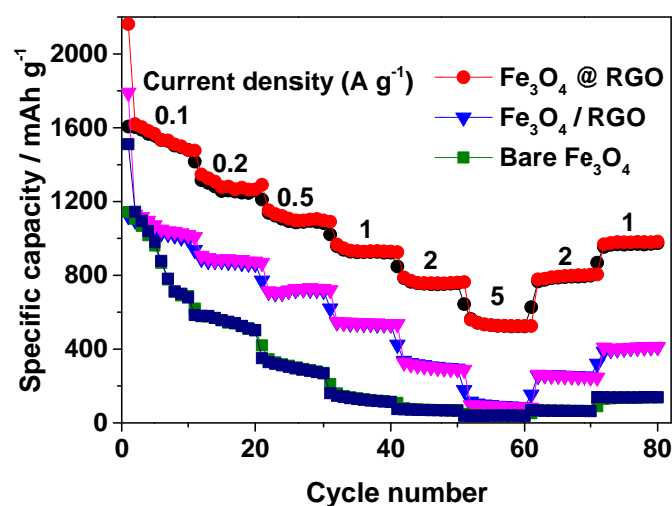

Figure S2. Comparison of the rate capabilities and cycle performance of the electrodes based on the  $\text{Fe}_3\text{O}_4$ @rGO composite, the bare  $\text{Fe}_3\text{O}_4$  microspheres, and a physical mixture of  $\text{Fe}_3\text{O}_4$  microspheres and rGO tested at rates varied from 0.1 to 5.0 A g<sup>-1</sup>.

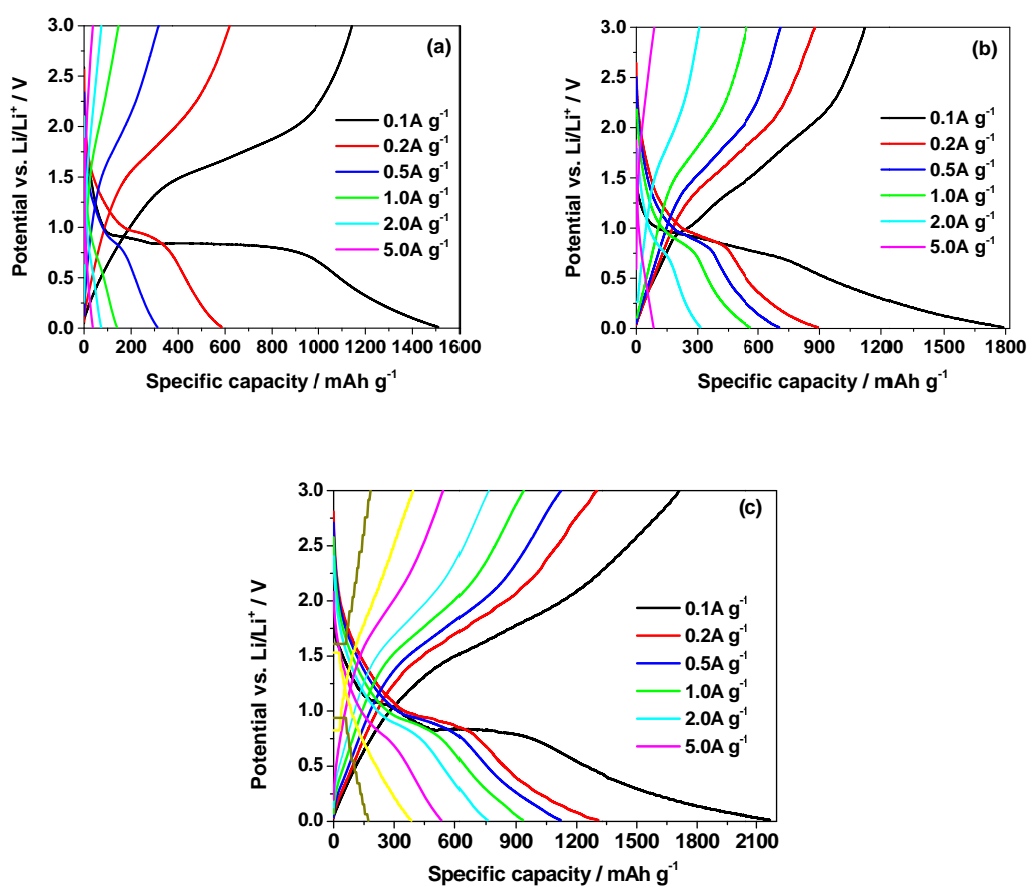

**Figure S3.** Galvanostatic discharge-charge profiles of electrodes based on (a) the bare  $\text{Fe}_3\text{O}_4$  microspheres, (b) a mixture of  $\text{Fe}_3\text{O}_4$  microsphere and RGO, and (c) the  $\text{Fe}_3\text{O}_4@\text{RGO}$  composites at rates varied from 0.1 to 5.0  $\text{A g}^{-1}$ .

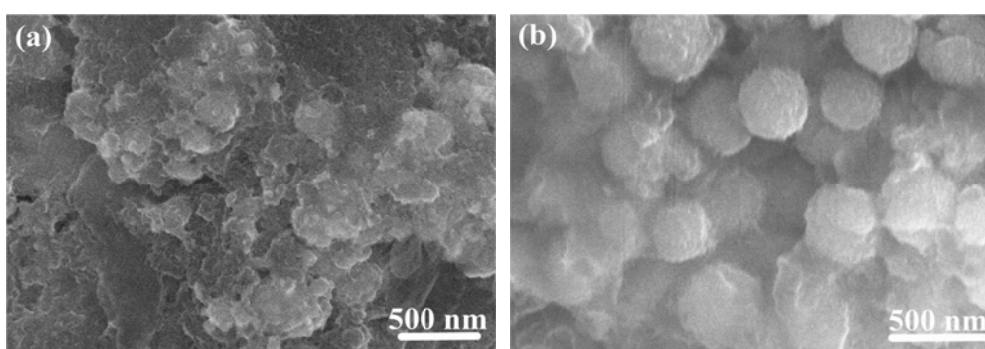

**Figure S4.** SEM images of (a) the  $\text{Fe}_3\text{O}_4$  microspheres and (b) the  $\text{Fe}_3\text{O}_4@\text{rGO}$  composites as the anode of lithium ion batteries discharged/charged for 100 cycles.
